# Supplementary material
Source: Royal Society of Chemistry journal article supplement (doi:10.1039/d6fo01977c)
Supplement: d6fo01977c1.pdf [file d6fo01977c1.pdf]

1 **Supplementary Information**

2 Table S.1 Primer sequences of related genes

| Gene          | Primer sequences (5'–3')        |
|---------------|---------------------------------|
| <i>PI3K</i>   | Forward: ACACCACGGTTTGGACTATGG  |
|               | Reverse: GGCTACAGTAGTGGGCTTGG   |
| <i>AKT</i>    | Forward: ATGAACGACGTAGCCATTGTG  |
|               | Reverse: TTGTAGCCAATAAAGGTGCCAT |
| <i>FoxO3a</i> | Forward: CATGCGCGTTCAGAATGAAGG  |
|               | Reverse: GACTGTCTGTCTGCCGACTC   |
| <i>GAPDH</i>  | Forward: GGTTGTCTCCTGCGACTTCA   |
|               | Reverse: TGGTCCAGGGTTTCTTACTCC  |

3 Table S.2 Endogenous differential metabolites.

| NO. | Index     | Compounds                | Formula                                                         | VIP  | P-value | Fold Change | MC vs NC | YRPG-M vs MC |
|-----|-----------|--------------------------|-----------------------------------------------------------------|------|---------|-------------|----------|--------------|
| 1   | MEDP0577  | Carnitine isoC4:0        | C <sub>11</sub> H <sub>21</sub> NO <sub>4</sub>                 | 1.59 | 0.00    | 0.35        | down     | up           |
| 2   | MEDP0510  | Carnitine C2:0           | C <sub>9</sub> H <sub>17</sub> NO <sub>4</sub>                  | 1.47 | 0.02    | 0.58        | down     | up           |
| 3   | MW0103351 | 2'-Deoxyuridine          | C <sub>9</sub> H <sub>12</sub> N <sub>2</sub> O <sub>5</sub>    | 1.58 | 0.04    | 2.30        | up       | down         |
| 4   | MW0105496 | Alanylarginine           | C <sub>9</sub> H <sub>19</sub> N <sub>5</sub> O <sub>3</sub>    | 1.50 | 0.02    | 0.92        | down     | up           |
| 5   | MEDP1321  | LPC (0:0/22:5)           | C <sub>30</sub> H <sub>53</sub> NO <sub>7</sub> P               | 1.44 | 0.03    | 0.82        | down     | up           |
| 6   | MW0152252 | Leu-Asn-Trp              | C <sub>21</sub> H <sub>29</sub> N <sub>5</sub> O <sub>5</sub>   | 1.59 | 0.00    | 0.71        | down     | up           |
| 7   | MW0169971 | Tryptophan               | C <sub>11</sub> H <sub>12</sub> N <sub>2</sub> O <sub>2</sub>   | 1.47 | 0.04    | 0.72        | down     | up           |
| 8   | MW0010797 | 5,6-EET                  | C <sub>20</sub> H <sub>32</sub> O <sub>3</sub>                  | 1.40 | 0.03    | 0.89        | down     | up           |
| 9   | MW0055349 | Pelargonic acid          | C <sub>9</sub> H <sub>18</sub> O <sub>2</sub>                   | 1.47 | 0.03    | 0.65        | down     | up           |
| 10  | MW0016123 | 3-Hydroxyisovaleric acid | C <sub>5</sub> H <sub>10</sub> O <sub>3</sub>                   | 1.55 | 0.01    | 2.58        | up       | down         |
| 11  | MW0054155 | Isovaleric acid          | C <sub>5</sub> H <sub>10</sub> O <sub>2</sub>                   | 1.41 | 0.04    | 0.52        | down     | up           |
| 12  | MW0005838 | 6-Phosphogluconic acid   | C <sub>6</sub> H <sub>13</sub> O <sub>10</sub> P                | 1.58 | 0.00    | 0.49        | down     | up           |
| 13  | MW0110295 | Tyrosyl-tryptophan       | C <sub>20</sub> H <sub>21</sub> N <sub>3</sub> O <sub>4</sub>   | 1.53 | 0.01    | 0.63        | down     | up           |
| 14  | MEDN0338  | DL-3-Phenyllactic acid   | C <sub>9</sub> H <sub>10</sub> O <sub>3</sub>                   | 1.47 | 0.04    | 0.19        | down     | up           |
| 15  | MW0012113 | 11-Dodecenoic acid       | C <sub>12</sub> H <sub>22</sub> O <sub>2</sub>                  | 1.44 | 0.02    | 0.58        | down     | up           |
| 16  | MW0124417 | Indole-3-carboxylic acid | C <sub>9</sub> H <sub>7</sub> NO <sub>2</sub>                   | 1.57 | 0.00    | 1.66        | up       | down         |
| 17  | MEDP1593  | S-Lactoylglutathione     | C <sub>13</sub> H <sub>21</sub> N <sub>3</sub> O <sub>8</sub> S | 1.62 | 0.00    | 0.52        | down     | up           |
| 18  | MW0152284 | Leu-Gln-Asn-Arg          | C <sub>21</sub> H <sub>39</sub> N <sub>9</sub> O <sub>7</sub>   | 1.64 | 0.00    | 3.99        | up       | down         |

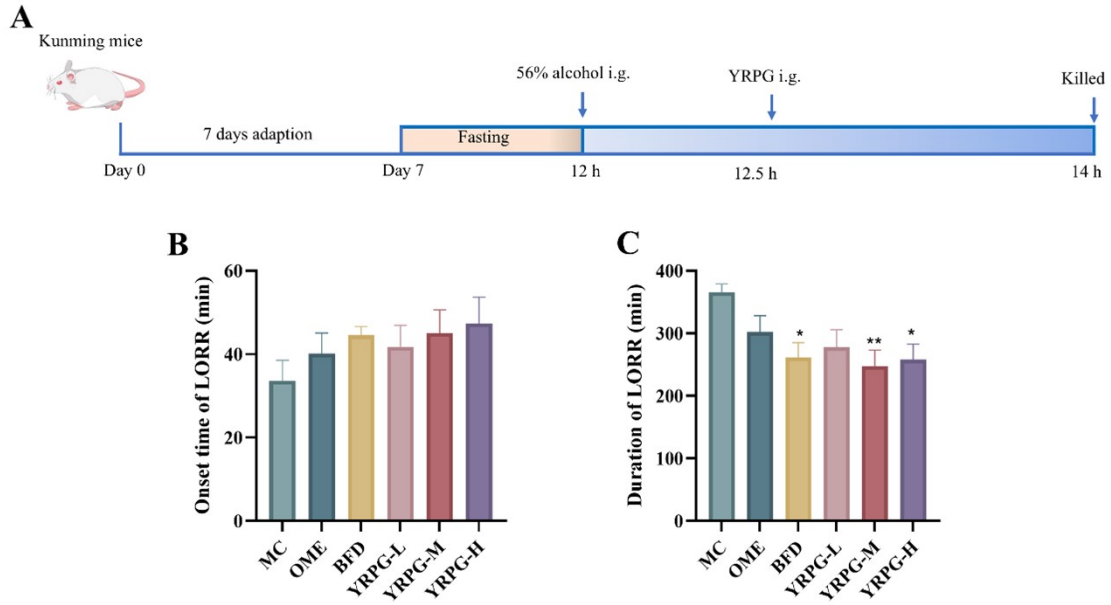

4

5 **Fig. S.1** Reparative effect of YRPG in AAI mice. (A) Experimental arrangement. (B) The onset

6 time of LORR. (C) The duration of LORR. Results were expressed as mean  $\pm$  SEM (n=8). \* $P$  <

7 0.05, \*\* $P$  < 0.01 compared with MC group.

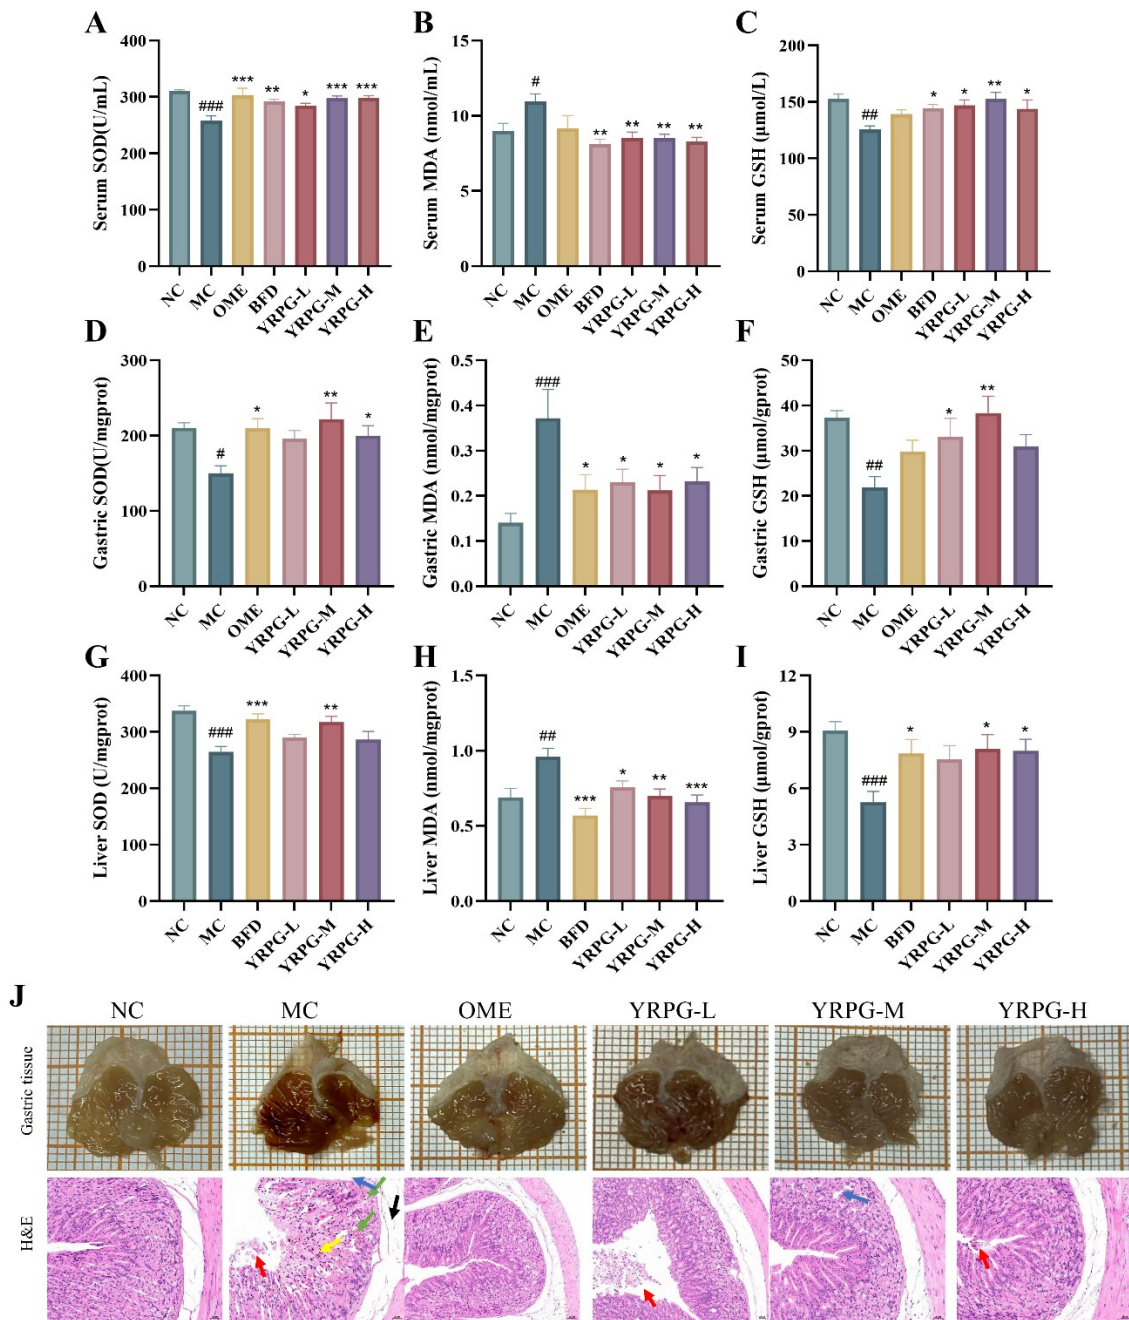

8

9 **Fig. S.2** Reparative effect of YRPG on gastric injury in acute alcohol injury mice. (A) Serum SOD  
 10 activity. (B) Serum MDA level. (C) Serum GSH level. (D) Gastric SOD activity. (E) Gastric  
 11 MDA level. (F) Gastric GSH level. (G) Liver SOD activity. (H) Liver MDA level. (I) Liver GSH  
 12 level. (J) Gastric morphology and H&E staining (Magnification 200×. Scale bar = 100 μm. The  
 13 image shows HE section analysis with annotations: The red arrow indicates loss of epithelial cells.

14 The yellow arrow points to inflammatory cells. The black arrow highlights submucosal edema.  
 15 The blue arrow signifies destruction of glandular structure. The green arrow indicates bleeding  
 16 sexual injury.). Results were expressed as mean  $\pm$  SEM (n=8). # $P < 0.05$ , ## $P < 0.01$ , ### $P < 0.001$   
 17 compared with NC group. \* $P < 0.05$ , \*\* $P < 0.01$ , \*\*\* $P < 0.001$  compared with MC group.

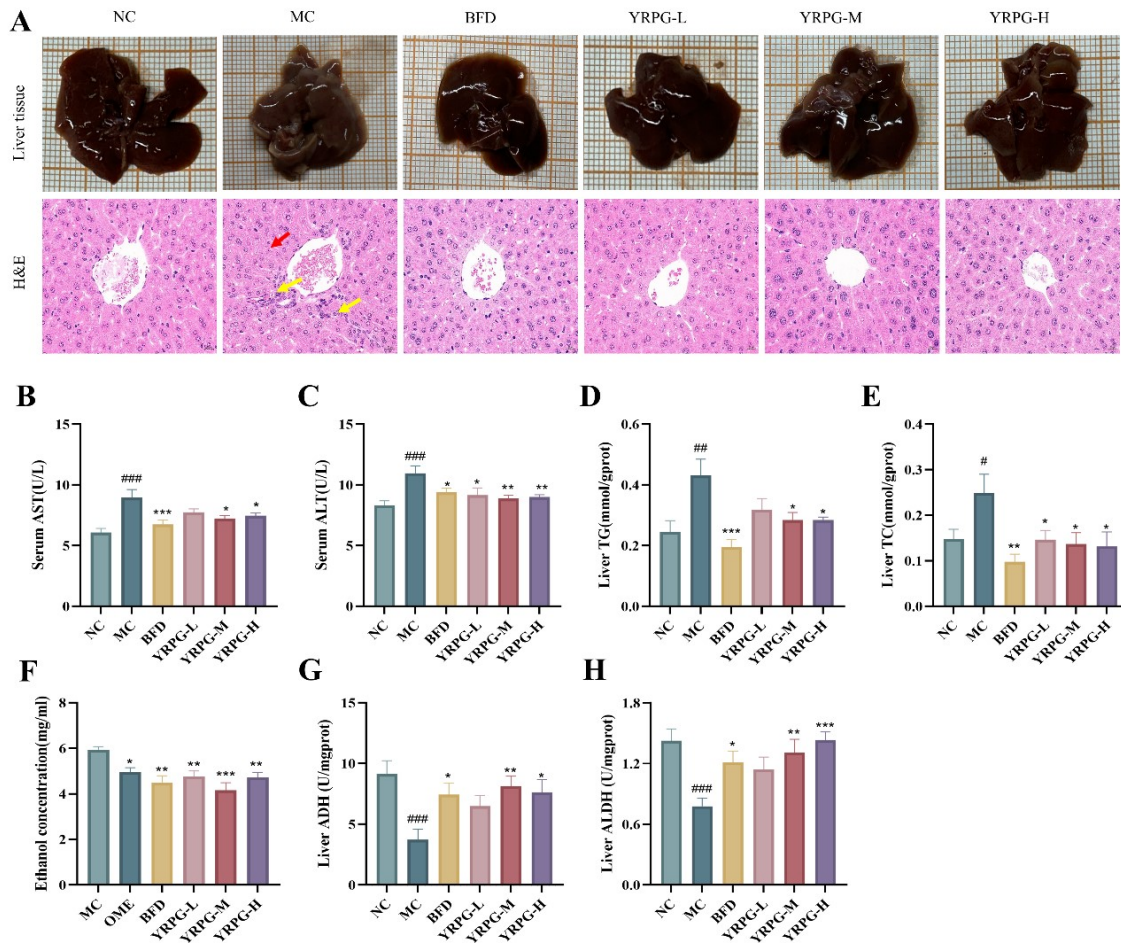

18  
 19 **Fig. S.3** Reparative effect of YRPG on liver injury and alcohol metabolism in acute alcohol injury  
 20 in mice. (A) Liver morphology and H&E staining (Magnification 400 $\times$ . Scale bar = 50  $\mu$ m. The  
 21 image shows HE section analysis with annotations: The yellow arrow points to inflammatory cells.  
 22 The red arrow represented the hepatocyte hypertrophy.). (B) Serum AST activity. (C) Serum ALT  
 23 activity. (D) Liver TG level. (E) Liver TC level. (F) Blood alcohol level. (G) Liver ADH activity.  
 24 (H) Liver ALDH activity. Results were expressed as mean  $\pm$  SEM (n=8). # $P < 0.05$ , ## $P < 0.01$ ,

25 ### $P < 0.001$  compared with NC group. \* $P < 0.05$ , \*\* $P < 0.01$ , \*\*\* $P < 0.001$  compared with MC

26 group.

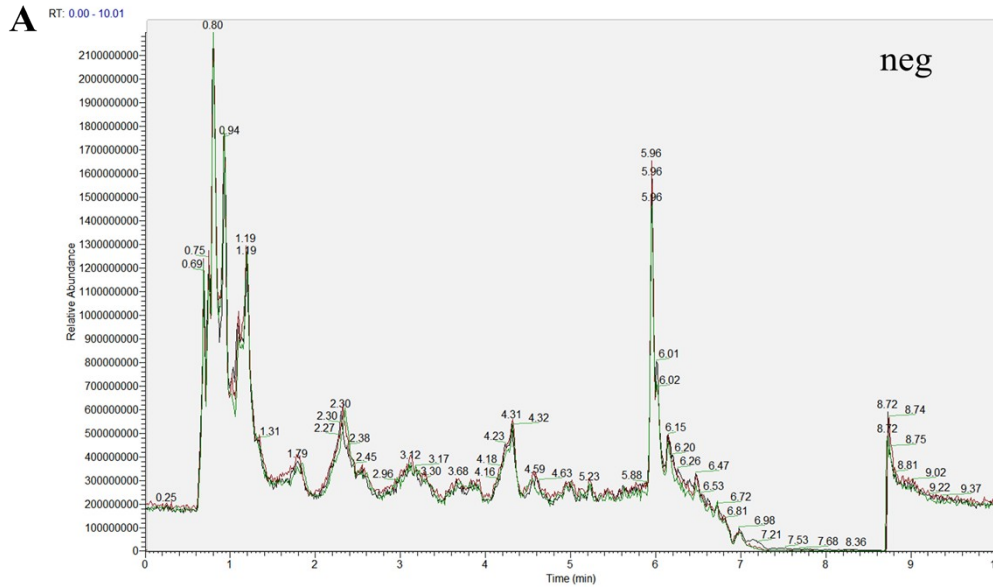

27

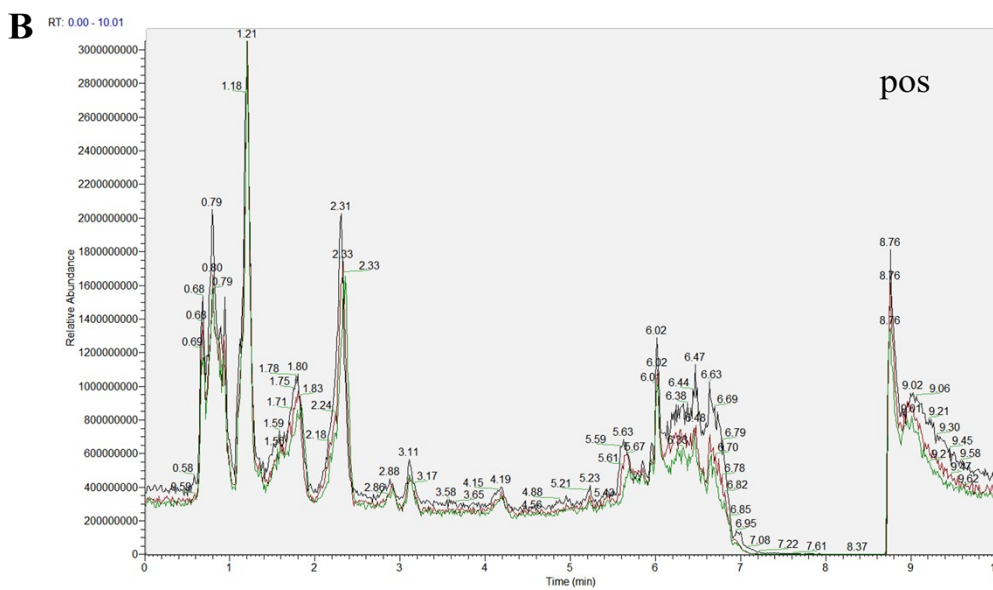

28

29 Fig. S.4 TIC of QC overlapped serum samples. (A) Negative ion mode. (B) Positive ion mode
